# Supplementary material for: Severe cytokine release syndrome is associated with hematologic toxicity following CD19 CAR T-cell therapy
Source: PubMed Central journal article supplement — Blood Adv. 2022 Mar 29;6(7):2055–68. doi: 10.1182/bloodadvances.2020004142 (PMC9006285; doi:10.1182/bloodadvances.2020004142), 2022-03-29
Supplement: advancesADV2020004142-suppl1.pdf [file advancesADV2020004142-suppl1.pdf]

**Supplemental Table S1. Patient and treatment characteristics by CRS grade**

| CRS Grade (n, %)                                                              | 0<br>(n=52, 30%)                 | 1<br>(n=40, 23%)                 | 2<br>(n=55, 32%)                  | 3-5<br>(n=26, 15%)               |
|-------------------------------------------------------------------------------|----------------------------------|----------------------------------|-----------------------------------|----------------------------------|
| <b>Age (years) – median (IQR) [range]</b>                                     | 56 (44, 64)<br>[24 – 71]         | 54 (46, 62)<br>[23 – 73]         | 55 (42, 66)<br>[20 – 74]          | 53 (41, 60)<br>[20 – 76]         |
| <b>Sex – n (%)</b>                                                            |                                  |                                  |                                   |                                  |
| Female                                                                        | 19 (37)                          | 9 (22)                           | 16 (29)                           | 14 (54)                          |
| Male                                                                          | 33 (63)                          | 31 (78)                          | 39 (71)                           | 12 (46)                          |
| <b>Race – n (%)</b>                                                           |                                  |                                  |                                   |                                  |
| White                                                                         | 47 (90)                          | 31 (78)                          | 49 (89)                           | 24 (92)                          |
| Non-white                                                                     | 5 (9.6)                          | 8 (20)                           | 6 (11)                            | 2 (7.7)                          |
| Unknown                                                                       | 0 (0)                            | 1 (2.5)                          | 0 (0)                             | 0 (0)                            |
| <b>Disease Type (n, %)</b>                                                    |                                  |                                  |                                   |                                  |
| ALL                                                                           | 14 (27)                          | 12 (30)                          | 23 (42)                           | 13 (50)                          |
| CLL                                                                           | 8 (15)                           | 15 (38)                          | 18 (33)                           | 7 (27)                           |
| NHL                                                                           | 30 (58)                          | 13 (32)                          | 14 (25)                           | 6 (23)                           |
| <b>Number of prior therapies – median (IQR) [range]</b>                       | 4 (2, 5)<br>[1 – 11]             | 4 (3, 6)<br>[1 – 10]             | 4 (3, 5)<br>[1 – 11]              | 4 (3, 5)<br>[1 – 9]              |
| <b>Prior HSCT – n (%)</b>                                                     |                                  |                                  |                                   |                                  |
| Allogeneic                                                                    | 7 (13)                           | 11 (28)                          | 13 (24)                           | 4 (15)                           |
| Autologous                                                                    | 11 (21)                          | 4 (10)                           | 6 (11)                            | 2 (7.7)                          |
| Both                                                                          | 1 (1.9)                          | 2 (5.0)                          | 0 (0)                             | 0 (0)                            |
| None                                                                          | 33 (63)                          | 23 (57)                          | 36 (65)                           | 20 (77)                          |
| <b>Pre-lymphodepletion marrow abnormal B-cells (%) – median (IQR) [range]</b> | 0 (0, 2)<br>[0 – 98]             | 10 (0, 59)<br>[0 – 92]           | 24 (0, 58)<br>[0 – 96]            | 75 (18, 86)<br>[0 – 98]          |
| <b>Pre-lymphodepletion ANC (x 10<sup>3</sup>/μl) – median (IQR) [range]</b>   | 2.46 (1.61, 3.51)<br>[0.17-12.4] | 2.92 (1.20, 5.00)<br>[0 – 23.17] | 2.50 (1.40, 4.72)<br>[0 – 13.65]  | 1.95 (0.68, 2.54)<br>[0 – 8.06]  |
| <b>Pre-lymphodepletion ALC (x 10<sup>3</sup>/μl) – median (IQR) [range]</b>   | 0.6 (0.4, 1.4)<br>[0.3 – 32.6]   | 1.0 (0.7, 2.4)<br>[0.1 – 11.4]   | 1.0 (0.6, 1.6)<br>[0.2 – 58.9]    | 0.9 (0.3, 2.1)<br>[0 – 42.8]     |
| <b>Pre-lymphodepletion Hgb (g/dL) – median (IQR) [range]</b>                  | 11.1 (9.8, 12.6)<br>[7.5 – 15.0] | 10.7 (9.6, 11.6)<br>[7.4 – 16.0] | 11.0 (10.0, 12.4)<br>[8.9 – 15.1] | 10.2 (9.3, 11.8)<br>[7.2 – 13.9] |
| <b>Pre-lymphodepletion Plt (x 10<sup>3</sup>/μl) – median (IQR) [range]</b>   | 128 (80, 197)<br>[9 – 448]       | 119 (66, 200)<br>[7 – 339]       | 139 (84, 212)<br>[10 – 434]       | 66 (36, 141)<br>[11 – 212]       |
| <b>Lymphodepletion – n (%)</b>                                                |                                  |                                  |                                   |                                  |
| High-intensity CyFlu                                                          | 22 (42)                          | 20 (50)                          | 25 (45)                           | 13 (50)                          |
| Low-intensity CyFlu                                                           | 21 (40)                          | 13 (32)                          | 24 (44)                           | 8 (31)                           |
| Non-CyFlu                                                                     | 9 (17)                           | 7 (18)                           | 6 (11)                            | 5 (19)                           |
| <b>CAR-T cell dose – n (%)</b>                                                |                                  |                                  |                                   |                                  |
| DL1                                                                           | 12 (23)                          | 10 (25)                          | 16 (29)                           | 9 (35)                           |
| DL2                                                                           | 37 (71)                          | 29 (72)                          | 36 (65)                           | 12 (46)                          |
| DL3                                                                           | 3 (5.8)                          | 1 (2.5)                          | 3 (5.5)                           | 5 (19)                           |
| <b>Neurotoxicity grade – n (%)</b>                                            |                                  |                                  |                                   |                                  |
| 0-1                                                                           | 52 (100)                         | 31 (78)                          | 33 (60)                           | 5 (19)                           |
| 2-3                                                                           | 0 (0)                            | 9 (22)                           | 22 (40)                           | 14 (54)                          |
| 4-5                                                                           | 0 (0)                            | 0 (0)                            | 0 (0)                             | 7 (27)                           |

High-intensity CyFlu, cyclophosphamide (Cy) 60 mg/kg or >1500 mg/m<sup>2</sup> with fludarabine (Flu) 75-125 mg/m<sup>2</sup>; low-intensity CyFlu, Cy 30 mg/kg or ≤1500 mg/m<sup>2</sup> with Flu 75-90 mg/m<sup>2</sup>; Non-CyFlu, any conditioning regimen other than as noted above including single agent Cy or Flu. CAR-T cell dose level (DL) - DL1 = 2 x 10<sup>5</sup> cells/kg, DL2 = 2 x 10<sup>6</sup> cells/kg, DL3 = 2 x 10<sup>7</sup> cells/kg. CRS grade as defined by Lee criteria<sup>1</sup>. Neurotoxicity grade as defined by CTCAE 4.0.3. HSCT, hematopoietic stem cell transplant; IQR, interquartile range; LD, lymphodepletion.

**Supplemental Table S2. Lymphodepletion regimens prior to CAR T-cell infusion**

| <b>Lymphodepletion Regimen</b>                                                         | <b>Number of Patients</b> |
|----------------------------------------------------------------------------------------|---------------------------|
| Cyclophosphamide 2 g/m <sup>2</sup> Day 1;<br>Etoposide 200 mg/m <sup>2</sup> Days 2-4 | 2                         |
| Cyclophosphamide 3 g/m <sup>2</sup> Day 1;<br>Etoposide 200 mg/m <sup>2</sup> Days 2-4 | 2                         |
| Cyclophosphamide 4 g/m <sup>2</sup> Day 1;<br>Etoposide 200 mg/m <sup>2</sup> Days 2-4 | 3                         |
| Cyclophosphamide 2 g/m <sup>2</sup> Day 1                                              | 14                        |
| Cyclophosphamide 3 g/m <sup>2</sup> Day 1                                              | 2                         |
| Cyclophosphamide 4 g/m <sup>2</sup> Day 1                                              | 1                         |
| Fludarabine 25 mg/m <sup>2</sup> Day 1-3                                               | 2                         |
| Cyclophosphamide 30 mg/kg Day 1;<br>Fludarabine 25 mg/m <sup>2</sup> Day 2-4           | 5                         |
| Cyclophosphamide 60 mg/kg Day 1;<br>Fludarabine 25 mg/m <sup>2</sup> Day 2-4           | 66                        |
| Cyclophosphamide 60 mg/kg Day 1;<br>Fludarabine 25 mg/m <sup>2</sup> Day 2-6           | 12                        |
| Cyclophosphamide 1 g/m <sup>2</sup> Day 1;<br>Fludarabine 25 mg/m <sup>2</sup> Day 2-4 | 1                         |
| Cyclophosphamide 3 g/m <sup>2</sup> Day 1;<br>Fludarabine 25 mg/m <sup>2</sup> Day 2-4 | 1                         |
| Cyclophosphamide 300 mg/m <sup>2</sup> and<br>Fludarabine 30 mg/m <sup>2</sup> Day 1-3 | 59                        |
| Cyclophosphamide 300 mg/m <sup>2</sup> and<br>Fludarabine 20 mg/m <sup>2</sup> Day 1-3 | 1                         |
| Cyclophosphamide 500 mg/m <sup>2</sup> and<br>Fludarabine 30 mg/m <sup>2</sup> Day 1-3 | 2                         |
| <b>Total</b>                                                                           | <b>173</b>                |

**Supplemental Table S3. Univariate analysis of patient, disease, and treatment variables (A, C) and serum cytokine levels (B, D) affecting ANC (A, B) and platelet recovery (C, D).**

**A. Day-28 ANC recovery**

| Variable                   | Coefficient | Standard Error | Test Statistics | p-value  | 95% CI          |
|----------------------------|-------------|----------------|-----------------|----------|-----------------|
| Pre-LD platelet            | 0.612       | 0.101          | 6.09            | 0        | 0.414 - 0.811   |
| Bone marrow disease burden | -0.074      | 0.025          | -2.967          | 3.46E-03 | -0.123 - -0.025 |
| NHL                        | 0.272       | 0.099          | 2.751           | 6.63E-03 | 0.077 - 0.467   |
| CAR-T dose level           | 0.212       | 0.077          | 2.737           | 6.90E-03 | 0.059 - 0.364   |
| CRS grade                  | -0.093      | 0.037          | -2.519          | 1.27E-02 | -0.167 - -0.02  |
| Ferritin MI                | -0.139      | 0.062          | -2.242          | 2.63E-02 | -0.261 - -0.017 |
| Age                        | 0.006       | 0.003          | 2.117           | 3.58E-02 | 0 - 0.012       |
| CLL                        | 0.198       | 0.106          | 1.873           | 6.28E-02 | -0.011 - 0.406  |
| Pre-LD ANC                 | 0.024       | 0.014          | 1.757           | 8.08E-02 | -0.003 - 0.051  |
| PT MI                      | -0.072      | 0.042          | -1.689          | 9.32E-02 | -0.155 - 0.012  |
| Prior allogeneic HSCT      | -0.149      | 0.102          | -1.465          | 1.45E-01 | -0.35 - 0.052   |
| Prior autologous HSCT      | 0.164       | 0.118          | 1.386           | 1.68E-01 | -0.07 - 0.398   |
| ICANS grade                | -0.036      | 0.033          | -1.067          | 2.88E-01 | -0.102 - 0.03   |
| Female sex                 | 0.07        | 0.092          | 0.765           | 4.45E-01 | -0.111 - 0.252  |
| Number of prior treatments | -0.014      | 0.02           | -0.71           | 4.79E-01 | -0.053 - 0.025  |
| Pre-LD ALC                 | -0.016      | 0.077          | -0.201          | 8.41E-01 | -0.168 - 0.137  |
| PTT MI                     | 0           | 0.009          | -0.041          | 9.67E-01 | -0.018 - 0.017  |

**B. Serum cytokine levels and day-28 ANC recovery**

| Variable        | Coefficient | Standard Error | Test Statistics | p-value  | 95% CI          |
|-----------------|-------------|----------------|-----------------|----------|-----------------|
| Pre-LD platelet | 0.612       | 0.101          | 6.09            | 0        | 0.414 - 0.811   |
| TGF-beta-1      | 0.527       | 0.11           | 4.804           | 3.50E-06 | 0.31 - 0.744    |
| IL-6            | -0.222      | 0.046          | -4.783          | 3.90E-06 | -0.314 - -0.131 |
| IL-8            | -0.22       | 0.065          | -3.371          | 9.36E-04 | -0.349 - -0.091 |
| MCP-1           | -0.254      | 0.083          | -3.052          | 2.66E-03 | -0.418 - -0.089 |
| IL-2R-alpha     | -0.189      | 0.067          | -2.832          | 5.21E-03 | -0.321 - -0.057 |
| sTNFR1 (p55)    | -0.386      | 0.152          | -2.544          | 1.19E-02 | -0.686 - -0.086 |
| IL-10           | -0.149      | 0.059          | -2.53           | 1.24E-02 | -0.264 - -0.033 |
| IL-18           | -0.159      | 0.074          | -2.146          | 3.33E-02 | -0.306 - -0.013 |
| IFN-gamma       | -0.111      | 0.052          | -2.146          | 3.34E-02 | -0.214 - -0.009 |
| IL-6R           | -0.362      | 0.176          | -2.053          | 4.16E-02 | -0.71 - -0.014  |
| TIM-3           | -0.178      | 0.087          | -2.036          | 4.34E-02 | -0.351 - -0.005 |
| IL-15           | -0.249      | 0.134          | -1.862          | 6.44E-02 | -0.513 - 0.015  |
| Pre-LD ANC      | 0.024       | 0.014          | 1.757           | 8.08E-02 | -0.003 - 0.051  |
| sTNFR1 (p75)    | -0.203      | 0.124          | -1.642          | 1.02E-01 | -0.448 - 0.041  |
| MIP-1           | -0.14       | 0.09           | -1.556          | 1.22E-01 | -0.319 - 0.038  |
| IL-2            | -0.156      | 0.103          | -1.515          | 1.32E-01 | -0.359 - 0.047  |

### C. Day-28 platelet recovery

| Variable                   | Coefficient | Standard Error | Test Statistics | p-value  | 95% CI          |
|----------------------------|-------------|----------------|-----------------|----------|-----------------|
| Pre-LD platelet            | 0.526       | 0.071          | 7.44            | 0        | 0.386 - 0.666   |
| CRS grade                  | -0.092      | 0.027          | -3.415          | 8.07E-04 | -0.145 - -0.039 |
| Number of prior treatments | -0.037      | 0.014          | -2.632          | 9.32E-03 | -0.066 - -0.009 |
| Bone marrow disease burden | -0.04       | 0.018          | -2.189          | 3.00E-02 | -0.077 - -0.004 |
| NHL                        | 0.14        | 0.073          | 1.907           | 5.83E-02 | -0.005 - 0.285  |
| Ferritin MI                | -0.085      | 0.046          | -1.865          | 6.41E-02 | -0.176 - 0.005  |
| ICANS grade                | -0.04       | 0.024          | -1.636          | 1.04E-01 | -0.088 - 0.008  |
| Prior allogeneic HSCT      | -0.121      | 0.075          | -1.627          | 1.06E-01 | -0.269 - 0.026  |
| PT MI                      | -0.039      | 0.031          | -1.246          | 2.15E-01 | -0.101 - 0.023  |
| Pre-LD ANC                 | 0.012       | 0.01           | 1.171           | 2.43E-01 | -0.008 - 0.032  |
| Age                        | 0.002       | 0.002          | 1.018           | 3.10E-01 | -0.002 - 0.007  |
| Pre-LD ALC                 | 0.057       | 0.057          | 1.013           | 3.13E-01 | -0.054 - 0.169  |
| CAR-T dose level           | 0.045       | 0.058          | 0.776           | 4.39E-01 | -0.069 - 0.159  |
| Female sex                 | -0.04       | 0.068          | -0.592          | 5.54E-01 | -0.173 - 0.093  |
| Prior autologous HSCT      | 0.044       | 0.087          | 0.498           | 6.19E-01 | -0.129 - 0.216  |
| PTT MI                     | 0           | 0.007          | -0.055          | 9.56E-01 | -0.013 - 0.012  |
| CLL                        | -0.003      | 0.078          | -0.037          | 9.70E-01 | -0.158 - 0.152  |

### D. Serum cytokine levels and day-28 platelet recovery

| Variable        | Coefficient | Standard Error | Test Statistics | p-value  | 95% CI          |
|-----------------|-------------|----------------|-----------------|----------|-----------------|
| TGF-beta-1      | 0.642       | 0.07           | 9.198           | 0        | 0.504 - 0.78    |
| Pre-LD platelet | 0.526       | 0.071          | 7.44            | 0        | 0.386 - 0.666   |
| IL-18           | -0.22       | 0.052          | -4.191          | 4.55E-05 | -0.324 - -0.116 |
| sTNFR1 (p55)    | -0.448      | 0.108          | -4.146          | 5.44E-05 | -0.661 - -0.235 |
| IL-6            | -0.141      | 0.035          | -4.046          | 8.03E-05 | -0.209 - -0.072 |
| IL-7            | 0.408       | 0.114          | 3.585           | 4.46E-04 | 0.183 - 0.633   |
| IL-10           | -0.127      | 0.043          | -2.97           | 3.43E-03 | -0.212 - -0.043 |
| sTNFR1 (p75)    | -0.256      | 0.089          | -2.859          | 4.81E-03 | -0.432 - -0.079 |
| IFN-gamma       | -0.102      | 0.038          | -2.709          | 7.48E-03 | -0.177 - -0.028 |
| IL-2R-alpha     | -0.121      | 0.049          | -2.457          | 1.51E-02 | -0.219 - -0.024 |
| IL-15           | -0.204      | 0.098          | -2.079          | 3.92E-02 | -0.397 - -0.01  |
| TIM-3           | -0.118      | 0.064          | -1.833          | 6.86E-02 | -0.245 - 0.009  |
| IL-6R           | -0.221      | 0.13           | -1.697          | 9.16E-02 | -0.478 - 0.036  |
| IL-8            | -0.079      | 0.049          | -1.607          | 1.10E-01 | -0.176 - 0.018  |
| Fas             | -0.164      | 0.109          | -1.502          | 1.35E-01 | -0.379 - 0.052  |
| MCP-1           | -0.087      | 0.062          | -1.387          | 1.67E-01 | -0.21 - 0.037   |
| Pre-LD ANC      | 0.012       | 0.01           | 1.171           | 2.43E-01 | -0.008 - 0.032  |

## Supplemental Table S4. Tocilizumab

### A. Tocilizumab use

| Tocilizumab administrations | Number of patients (%) |
|-----------------------------|------------------------|
| 0                           | 139 (80)               |
| 1                           | 23 (13.3)              |
| 2                           | 7 (4)                  |
| 3                           | 2 (1.2)                |
| 4                           | 3 (1.7)                |

### B: Sensitivity analysis - IL6 serum concentrations and tocilizumab administrations

#### ANC Recovery

| Variable   | Univariate |                    | Multivariate<br>(IL6+Toci_n) |                    | Multivariate<br>(IL6+Toci_n+IL6*Toci_n) |                    |
|------------|------------|--------------------|------------------------------|--------------------|-----------------------------------------|--------------------|
|            | beta       | p-value            | beta                         | p-value            | beta                                    | p-value            |
| IL6        | -0.22      | 3.9e <sup>-6</sup> | -0.26                        | 7.9e <sup>-6</sup> | -0.28                                   | 1.6e <sup>-5</sup> |
| Toci_n     | -0.11      | 0.12               | 0.08                         | 0.29               | -0.086                                  | 0.68               |
| IL6*Toci_n |            |                    |                              |                    | 0.067                                   | 0.38               |

#### Plt Recovery

| Variable   | Univariate |                    | Multivariate<br>(IL6+Toci_n) |         | Multivariate<br>(IL6+Toci_n+IL6*Toci_n) |         |
|------------|------------|--------------------|------------------------------|---------|-----------------------------------------|---------|
|            | beta       | p-value            | beta                         | p-value | beta                                    | p-value |
| IL6        | -0.14      | 8.0e <sup>-5</sup> | -0.12                        | 0.004   | -0.10                                   | 0.03    |
| Toci_n     | -0.14      | 0.006              | -0.05                        | 0.41    | 0.066                                   | 0.67    |
| IL6*Toci_n |            |                    |                              |         | -0.045                                  | 0.43    |

Toci\_n (number of tocilizumab administrations); IL6 (peak serum IL6 level)

**Supplemental Table S5. Proportion of variables missing values**

| <b>Variable</b>            | <b>Number</b> | <b>Proportion</b> |
|----------------------------|---------------|-------------------|
| D-dimer                    | 72            | 0.44              |
| CRP                        | 66            | 0.4               |
| Fibrinogen                 | 57            | 0.35              |
| Pre-LD PTT                 | 39            | 0.24              |
| Pre-LD PT                  | 38            | 0.23              |
| Pre-LD ferritin            | 34            | 0.21              |
| IL-5                       | 16            | 0.1               |
| sTNFR1 (p75)               | 16            | 0.1               |
| IL-22                      | 15            | 0.09              |
| Fas                        | 15            | 0.09              |
| MCP-1                      | 10            | 0.06              |
| TGF-beta-1                 | 9             | 0.05              |
| IL-15                      | 9             | 0.05              |
| IL-18                      | 9             | 0.05              |
| sTNFR1 (p55)               | 7             | 0.04              |
| MIP-1                      | 4             | 0.02              |
| TIM-3                      | 2             | 0.01              |
| IL-2                       | 1             | 0.01              |
| IL-2R-alpha                | 1             | 0.01              |
| IL-7                       | 1             | 0.01              |
| IL-8                       | 1             | 0.01              |
| IL-6R                      | 1             | 0.01              |
| TNF-alpha                  | 1             | 0.01              |
| Pre-LD ALC                 | 1             | 0.01              |
| Bone marrow disease burden | 1             | 0.01              |
| IFN-gamma                  | 0             | 0                 |
| IL-10                      | 0             | 0                 |
| IL-6                       | 0             | 0                 |
| Female sex                 | 0             | 0                 |
| Age                        | 0             | 0                 |
| CLL                        | 0             | 0                 |
| NHL                        | 0             | 0                 |
| Prior allogeneic HSCT      | 0             | 0                 |
| Prior autologous HSCT      | 0             | 0                 |
| ICANS grade                | 0             | 0                 |
| CRS grade                  | 0             | 0                 |
| Number of prior treatments | 0             | 0                 |
| Pre-LD ANC                 | 0             | 0                 |
| Pre-LD platelet            | 0             | 0                 |
| CAR-T dose level           | 0             | 0                 |

**Supplemental Table S6: Patient and treatment characteristics by ANC or platelet recovery**

| Hematopoietic Recovery                                                 | ANC Recovery<br>n=157 (90.1%)       | ANC Non-Recovery<br>n=16 (9.2%)    | Platelet Recovery<br>n=148 (86%)    | Platelet Non-recovery<br>n=25 (14.5%) |
|------------------------------------------------------------------------|-------------------------------------|------------------------------------|-------------------------------------|---------------------------------------|
| Age (years) – median (IQR) [range]                                     | 55 (43, 64)<br>[20 – 76]            | 50 (37, 58)<br>[20 – 70]           | 55 (44, 64)<br>[20 – 76]            | 52 (35, 59)<br>[20 – 76]              |
| Sex – n (%)                                                            |                                     |                                    |                                     |                                       |
| Female                                                                 | 54 (34)                             | 4 (25)                             | 51 (34)                             | 7 (28)                                |
| Male                                                                   | 103 (66)                            | 12 (75)                            | 97 (66)                             | 18 (72)                               |
| Race – n (%)                                                           |                                     |                                    |                                     |                                       |
| White                                                                  | 137 (87)                            | 14 (88)                            | 127 (86)                            | 24 (96)                               |
| Non-white                                                              | 19 (12)                             | 2 (12)                             | 20 (14)                             | 1 (4.0)                               |
| Unknown                                                                | 1 (0.6)                             | 0 (16)                             | 1 (0.7)                             | 0 (0)                                 |
| Disease Type (n, %)                                                    |                                     |                                    |                                     |                                       |
| ALL                                                                    | 53 (34)                             | 9 (56)                             | 51 (34)                             | 11 (44)                               |
| CLL                                                                    | 42 (27)                             | 6 (38)                             | 40 (27)                             | 8 (32)                                |
| NHL                                                                    | 62 (39)                             | 1 (6.2)                            | 57 (39)                             | 6 (24)                                |
| Number of prior therapies – median (IQR) [range]                       | 4 (3, 5)<br>[1 – 11]                | 5 (3, 7)<br>[2 – 10]               | 4 (3, 5)<br>[1 – 11]                | 5 (4, 6)<br>[2 – 10]                  |
| Prior HSCT – n (%)                                                     |                                     |                                    |                                     |                                       |
| Allogeneic                                                             | 31 (20)                             | 4 (25)                             | 28 (19)                             | 7 (28)                                |
| Autologous                                                             | 23 (15)                             | 0 (0)                              | 20 (14)                             | 3 (12)                                |
| Both                                                                   | 3 (1.9)                             | 0 (0)                              | 3 (2.0)                             | 0 (0)                                 |
| None                                                                   | 100 (64)                            | 12 (75)                            | 97 (66)                             | 15 (60)                               |
| Pre-lymphodepletion marrow abnormal B-cells (%) – median (IQR) [range] | 3 (0, 55)<br>[0 – 98]               | 52 (30, 80)<br>[0 – 96]            | 4 (0, 50)<br>[0 – 98]               | 40 (0, 87)<br>[0 – 96]                |
| Pre-lymphodepletion ANC (x 10 <sup>3</sup> /μl) – median (IQR) [range] | 2.50<br>(1.39, 4.36)<br>[0 – 23.17] | 1.06<br>(0.20, 2.53)<br>[0 – 6.91] | 2.62<br>(1.41, 4.47)<br>[0 – 23.17] | 1.67<br>(0.59, 2.41)<br>[0 – 8.06]    |
| Pre-lymphodepletion ALC (x 10 <sup>3</sup> /μl) – median (IQR) [range] | 0.9 (0.5, 1.7)<br>[0 – 58.9]        | 0.9 (0.7, 1.1)<br>[0.1 – 42.8]     | 0.9 (0.5, 1.8)<br>[0 – 58.9]        | 0.8 (0.4, 1.1)<br>[0 – 42.8]          |
| Pre-lymphodepletion Hgb (g/dL) – median (IQR) [range]                  | 10.8 (9.8, 12.1)<br>[7.2 – 16]      | 10.5 (9.5, 12.3)<br>[7.3 – 14.1]   | 11.00 (9.9, 12.3)<br>[7.3 – 16.0]   | 10.3 (9.6, 10.7)<br>[7.2 – 14.0]      |
| Pre-lymphodepletion Plt (x 10 <sup>3</sup> /μl) – median (IQR) [range] | 129 (76, 200)<br>[9 – 448]          | 36 (22, 94)<br>[7 – 261]           | 139 (83, 202)<br>[9 – 448]          | 36 (22, 108)<br>[7 – 412]             |
| Lymphodepletion – n (%)                                                |                                     |                                    |                                     |                                       |
| High-intensity CyFlu                                                   | 75 (48)                             | 5 (31)                             | 71 (48)                             | 9 (36)                                |
| Low-intensity CyFlu                                                    | 58 (37)                             | 8 (50)                             | 55 (37)                             | 11 (44)                               |
| Non-CyFlu                                                              | 24 (15)                             | 3 (19)                             | 22 (15)                             | 5 (20)                                |
| CAR-T cell dose – n (%)                                                |                                     |                                    |                                     |                                       |
| DL1                                                                    | 41 (26)                             | 6 (38)                             | 38 (26)                             | 9 (36)                                |
| DL2                                                                    | 105 (67)                            | 9 (56)                             | 102 (69)                            | 12 (48)                               |
| DL3                                                                    | 11 (7.0)                            | 1 (6.2)                            | 8 (5.4)                             | 4 (16)                                |
| CRS grade – n (%)                                                      |                                     |                                    |                                     |                                       |
| 0                                                                      | 51 (32)                             | 1 (6.2)                            | 48 (32)                             | 4 (16)                                |
| 1                                                                      | 36 (23)                             | 4 (25)                             | 36 (24)                             | 4 (16)                                |
| 2                                                                      | 50 (32)                             | 5 (31)                             | 48 (32)                             | 7 (28)                                |
| 3-5                                                                    | 20 (13)                             | 6 (38)                             | 16 (11)                             | 10 (40)                               |
| Neurotoxicity grade – n (%)                                            |                                     |                                    |                                     |                                       |
| 0-1                                                                    | 112 (71)                            | 9 (56)                             | 105 (71)                            | 16 (64)                               |
| 2-3                                                                    | 42 (27)                             | 3 (19)                             | 41 (28)                             | 4 (16)                                |
| 4-5                                                                    | 3 (1.9)                             | 4 (25)                             | 2 (1.4)                             | 5 (20)                                |

High-intensity CyFlu, cyclophosphamide (Cy) 60 mg/kg or >1500 mg/m<sup>2</sup> with fludarabine (Flu) 75-125 mg/m<sup>2</sup>; low-intensity CyFlu, Cy 30 mg/kg or ≤1500 mg/m<sup>2</sup> with Flu 75-90 mg/m<sup>2</sup>; Non-CyFlu, any conditioning regimen other than as noted above including single agent Cy or Flu. CAR-T cell dose level (DL) - DL1 = 2 x 10<sup>5</sup> cells/kg, DL2 = 2 x 10<sup>6</sup> cells/kg, DL3 = 2 x 10<sup>7</sup> cells/kg. CRS grade as defined by Lee criteria<sup>1</sup>. Neurotoxicity grade as defined by CTCAE 4.0.3. HSCT, hematopoietic stem cell transplant; IQR, interquartile range; LD, lymphodepletion.

## Supplemental Figure S1. Kinetics of cytokines following CAR T-cell infusion

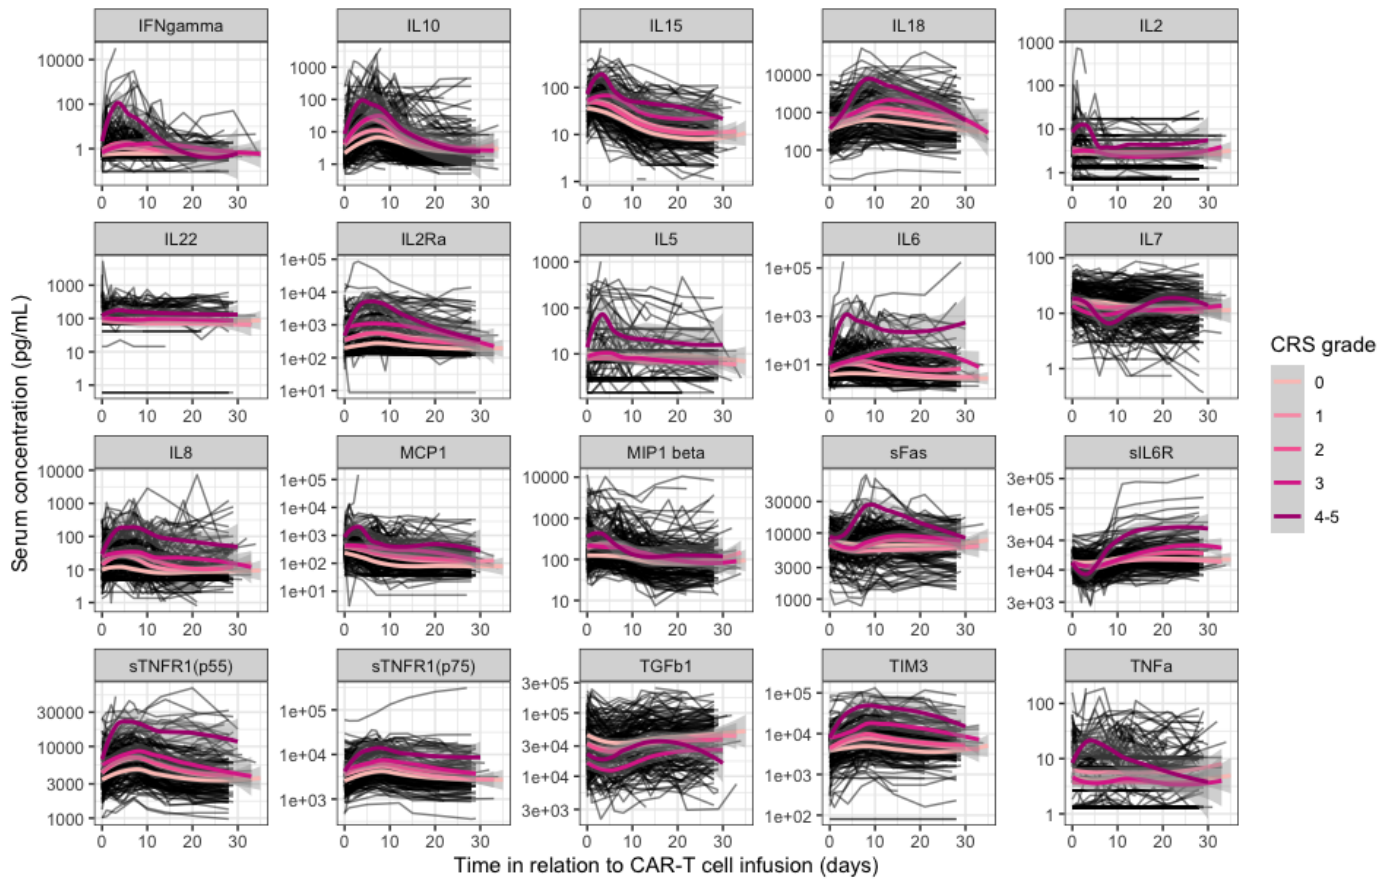

Serum concentration (pg/mL) of various cytokines at the indicated times following CAR T-cell infusion for all patients in study cohort (black lines). Non-parametric smoothing using locally estimated scatterplot smoothing (LOESS) stratified by CRS-grade.

## Supplemental References

1. Lee DW, Gardner R, Porter DL, et al. Current concepts in the diagnosis and management of cytokine release syndrome. *Blood*. 2014;124(2):188-195.



# Supplementary Figure S2. Day 28 ANC and Platelet Count by Response Status

**A** ANC at Day 28

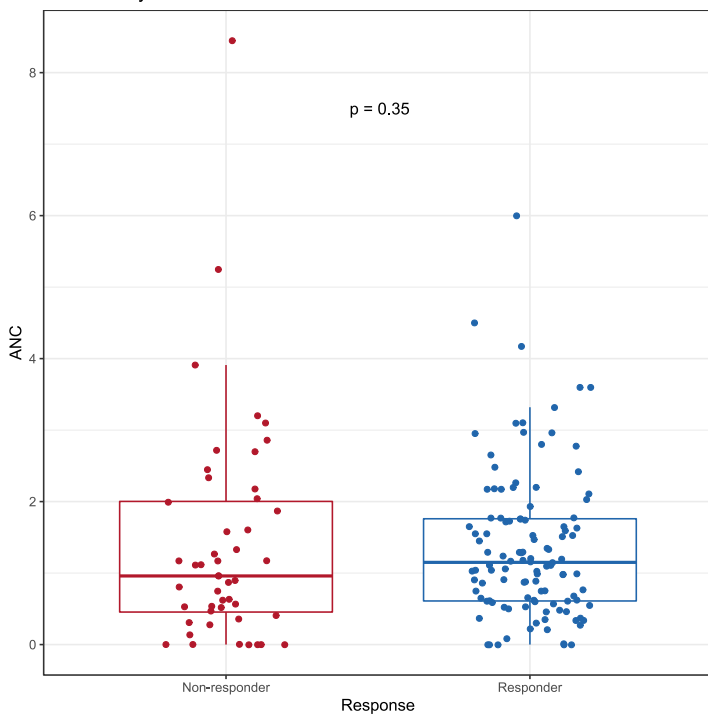

Response ■ Non-responder ■ Responder

**B** ANC at Day 28

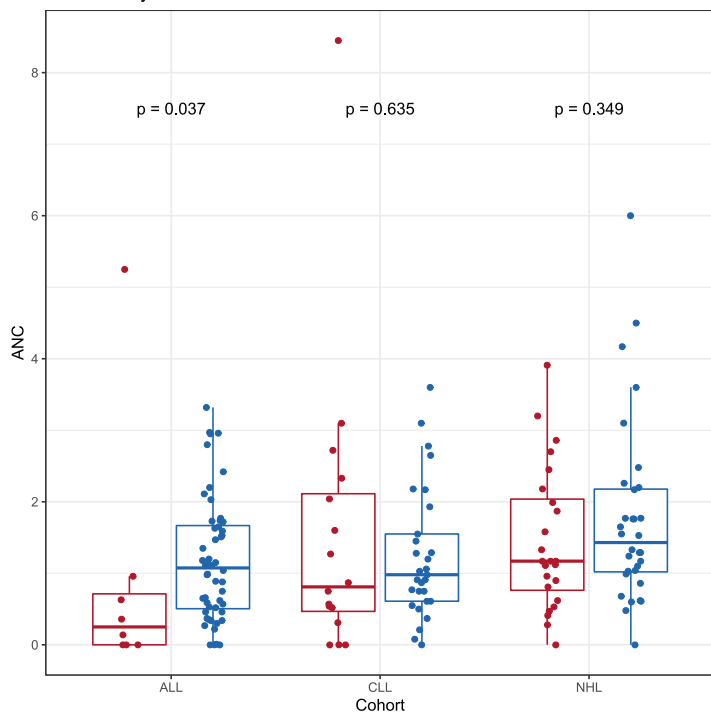

**C** Platelet Count at Day 28

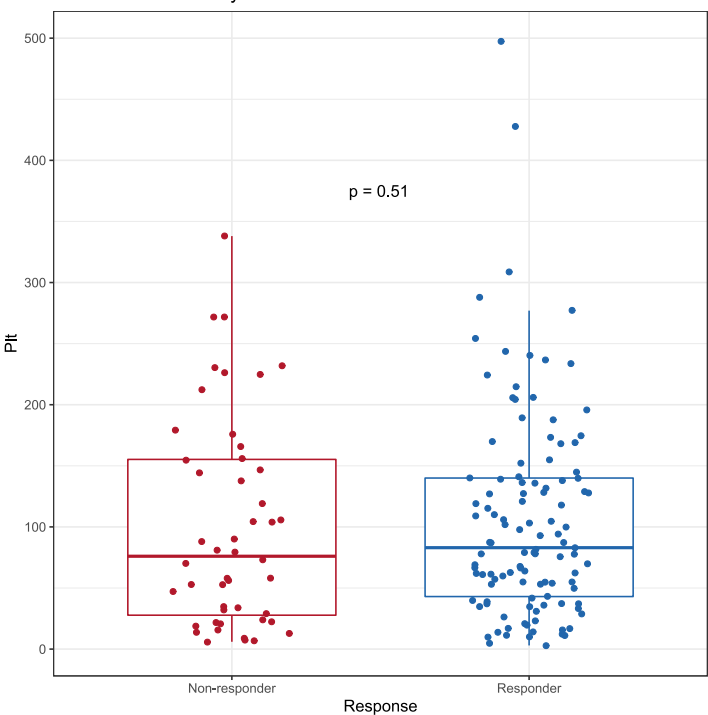

Response ■ Non-responder ■ Responder

**D** Platelet Count at Day 28

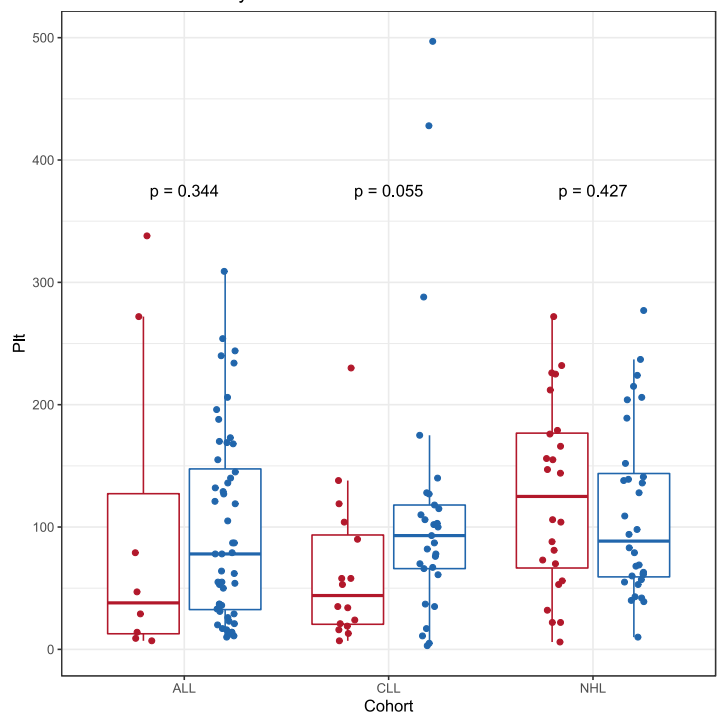

# Supplemental Figure S3. Cumulative Incidence of Hematopoietic Recovery

**A** ANC recovery

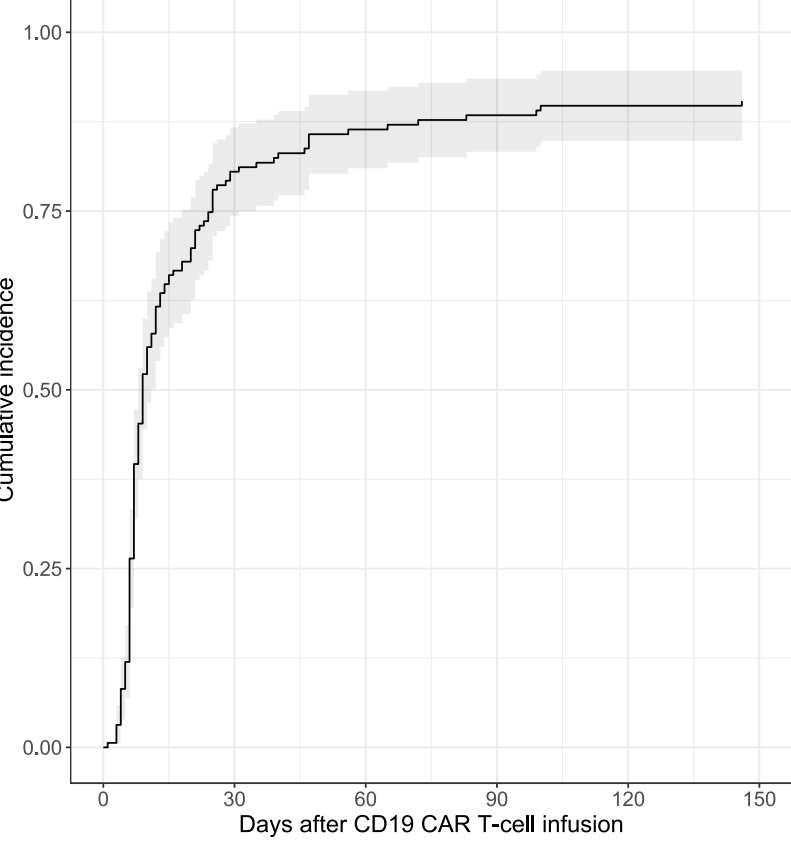

**Number at risk: n (%)**  
 159 (100)      22 (14)      8 (5)      4 (3)      1 (1)      0 (0)

**B** Platelet recovery

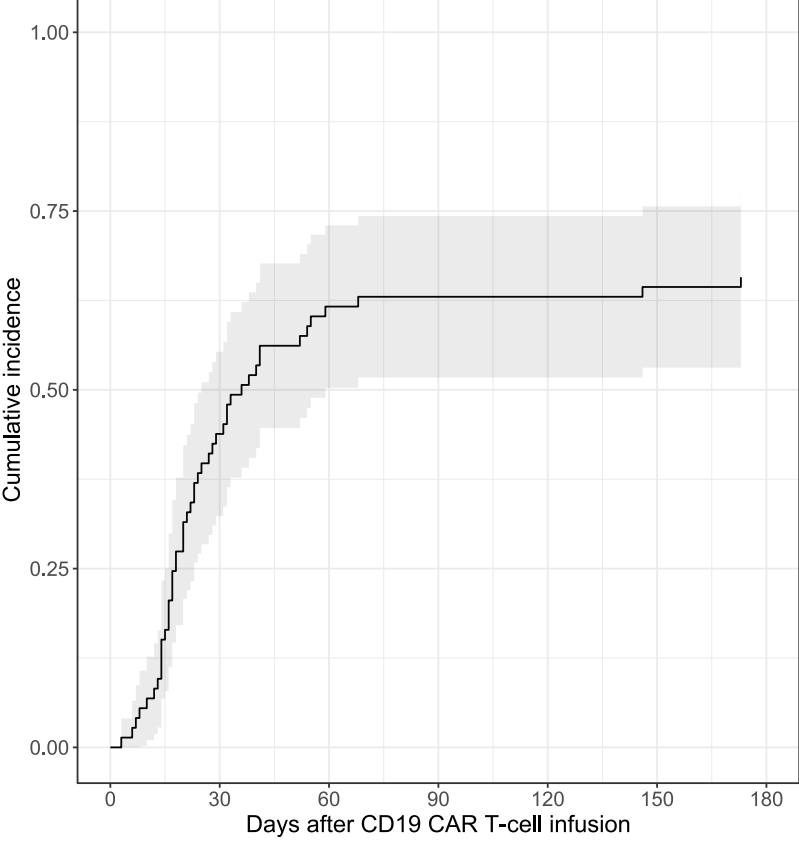

**Number at risk: n (%)**  
 73 (100)      28 (38)      7 (10)      4 (5)      3 (2)      1 (1)      0 (0)

# Supplemental Figure S4. Cumulative Incidence of Hematopoietic Recovery by Disease Cohort

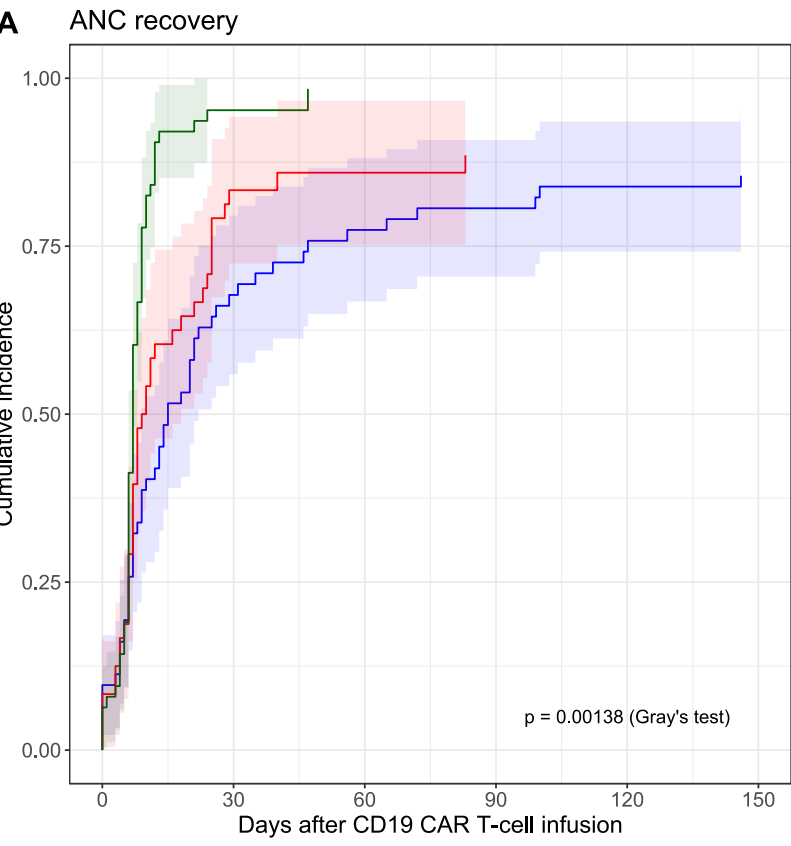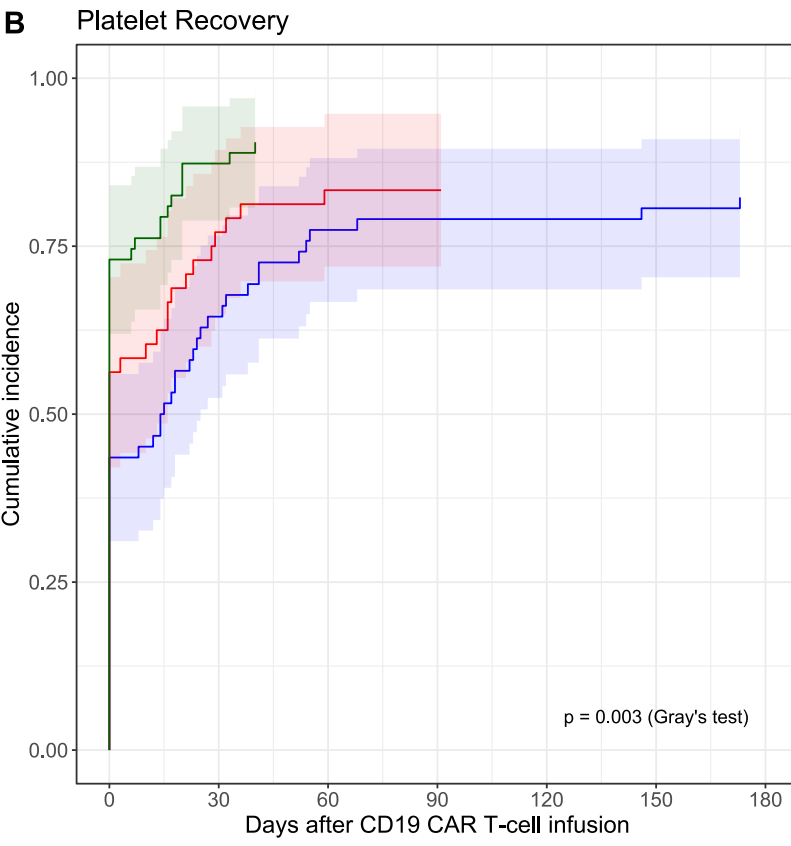

Cohort ALL CLL NHL

Number at risk: n (%)

|          |         |        |       |       |       |
|----------|---------|--------|-------|-------|-------|
| 62 (100) | 15 (24) | 7 (11) | 4 (6) | 1 (2) | 0 (0) |
| 48 (100) | 5 (10)  | 1 (2)  | 0 (0) | 0 (0) | 0 (0) |
| 63 (100) | 2 (3)   | 0 (0)  | 0 (0) | 0 (0) | 0 (0) |

Number at risk: n (%)

|          |         |        |       |       |       |       |
|----------|---------|--------|-------|-------|-------|-------|
| 62 (100) | 16 (26) | 6 (10) | 3 (5) | 3 (5) | 1 (2) | 0 (0) |
| 48 (100) | 8 (17)  | 1 (2)  | 1 (2) | 0 (0) | 0 (0) | 0 (0) |
| 63 (100) | 4 (6)   | 0 (0)  | 0 (0) | 0 (0) | 0 (0) | 0 (0) |
